# Supplementary material
Source: ML conference proceedings conference paper supplement (https://openreview.net/forum?id=YKW98Icu1X)
Supplement: supplementary_material [file attachment]

## Sheet: alexandrabotez
URL	Correct	What is the primary emphasis of this puzzle?	Calculation: this puzzle requires the player to think through the entire solution before playing their first move.	Pattern recognition: this puzzle teaches useful or un-ordinary motifs, e.g. the motifs are not banal/overdone, or if they are, the puzzle puts an unique spin on them.	Informativeness: the solution goes down “the right path” to make sure the player understands the point of the puzzle	Rating: is this puzzle appropriate for someone rated at Allen's skill level?	Quality: this is a high-quality puzzle, regardless of whether it is at the correct ELO level or not.	Fun: I think this puzzle would be enjoyable and fun to solve by players at the target ELO.	Additional notes: please write a 1-2 sentence justification of your ratings
https://www.chess.com/puzzles/problem/1171992/practice	FALSE
https://www.chess.com/puzzles/problem/40015/practice	FALSE
https://www.chess.com/puzzles/problem/1340003/practice	FALSE
https://www.chess.com/puzzles/problem/1289287/practice	FALSE
https://www.chess.com/puzzles/problem/637046/practice	FALSE
https://www.chess.com/puzzles/problem/637928/practice	FALSE
https://www.chess.com/puzzles/problem/1301639/practice	FALSE
https://www.chess.com/puzzles/problem/520570/practice	FALSE
https://www.chess.com/puzzles/problem/1290135/practice	FALSE
https://www.chess.com/puzzles/problem/582374/practice	FALSE
https://www.chess.com/puzzles/problem/1283627/practice	FALSE
https://www.chess.com/puzzles/problem/1331945/practice	FALSE
https://www.chess.com/puzzles/problem/1076776/practice	FALSE
https://www.chess.com/puzzles/problem/527422/practice	FALSE
https://www.chess.com/puzzles/problem/764204/practice	FALSE
https://www.chess.com/puzzles/problem/35594/practice	FALSE
https://www.chess.com/puzzles/problem/1455604/practice	FALSE
https://www.chess.com/puzzles/problem/1346835/practice	FALSE
https://www.chess.com/puzzles/problem/98573/practice	FALSE
https://www.chess.com/puzzles/problem/1247339/practice	FALSE
https://www.chess.com/puzzles/problem/1099362/practice	FALSE
https://www.chess.com/puzzles/problem/1283265/practice	FALSE
https://www.chess.com/puzzles/problem/1008248/practice	FALSE
https://www.chess.com/puzzles/problem/1061844/practice	FALSE
https://www.chess.com/puzzles/problem/1291541/practice	FALSE
https://www.chess.com/puzzles/problem/1195544/practice	FALSE
https://www.chess.com/puzzles/problem/1061588/practice	FALSE
https://www.chess.com/puzzles/problem/1182514/practice	FALSE
https://www.chess.com/puzzles/problem/64037/practice	FALSE
https://www.chess.com/puzzles/problem/765064/practice	FALSE
